# Supplementary material for: Permafrost distribution and conditions at the headwalls of two receding glaciers (Schladming and Hallstatt glaciers) in the Dachstein Massif, Northern Calcareous Alps, Austria
Source: Copernicus journal article supplement (doi:10.5194/tc-14-1173-2020), 2020-04-06
Supplement: Supplementary file 1 [file tc-14-1173-2020-supplement.zip]

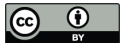

## *Supplement of*

# **Permafrost distribution and conditions at the headwalls of two receding glaciers (Schladming and Hallstatt glaciers) in the Dachstein Massif, Northern Calcareous Alps, Austria**

**Matthias Rode et al.**

*Correspondence to:* Andreas Kellerer-Pirklbauer ([andreas.kellerer@uni-graz.at](mailto:andreas.kellerer@uni-graz.at))

- tc-14-1173-2020-supplement-title-page.pdf
- ERT\_MS\_D.dat
- ERT\_MS\_G.dat
- ERT\_MS\_H.dat
- ERT\_MS\_K1.dat
- ERT\_MS\_K2.dat
- ERT\_MS\_K3.dat
- Rode\_etal\_2020\_Data\_description.docx
- iButtons\_MS\_D.xlsx
- iButtons\_MS\_G.xlsx
- iButtons\_MS\_H.xlsx
- iButtons\_MS\_K.xlsx

The copyright of individual parts of the supplement might differ from the CC BY 4.0 License.
